# Supplementary material
Source: PubMed Central journal article supplement (PMC2797034)
Supplement: fj.09-136457_1.pdf [file fj.09-136457_1.pdf]

## Supplemental Fig. S1

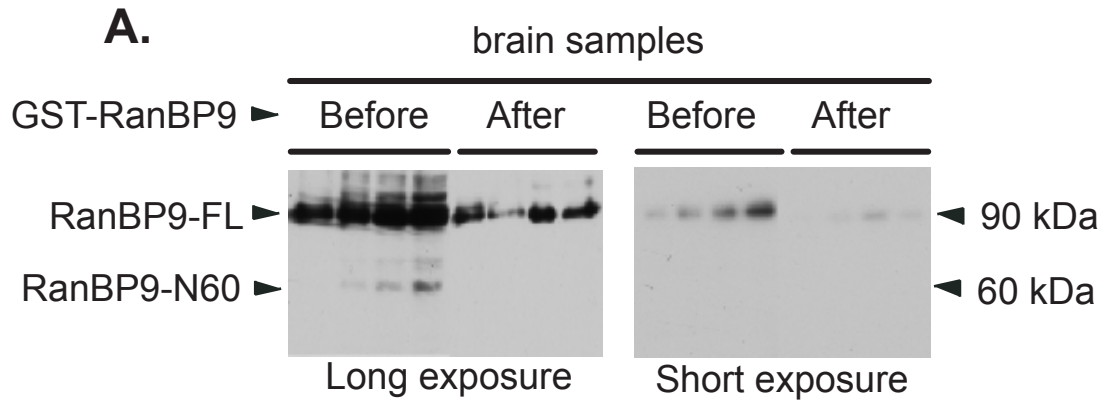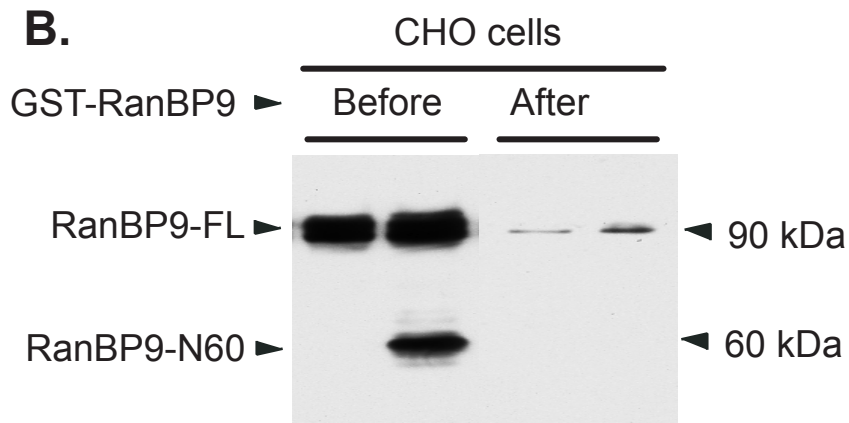

**Supplemental Figure S1.** The N60 band is specific to RanBP9. To verify the specificity of N60 band to RanBP9, normal control (A: lanes 1,2, 5,6)) and AD brain samples (A: lanes 3,4,7,8) or lysates from CHO-APP751 cells (B: lanes 1,3) or CHO-APP751 cells transfected with RanBP9-FL (B: lanes 2,4) were immunoblotted with RanBP9 antibody solutions with or without depletion of antibody by recombinant GST-RanBP9 purified sepharose beads. Cut blots were placed back together after immunoblotting and subjected to ECL. Note that immunoreactivity for RanBP9-FL and RanBP9-N60 are similarly reduced after depletion of RanBP9 antibody by recombinant GST-RanBP9.

Supplemental Table 1. Potential functions of RanBP9 domains

| Domain name                               | Amino acids | Functional implications                                                          |
|-------------------------------------------|-------------|----------------------------------------------------------------------------------|
| 1. Proline Rich Domain (PRD)              | 5-121       | Rapid recruitment of signaling components                                        |
| 2. Spla and the Ryanodine receptor (SPRY) | 147-333     | Protein-protein interactions (binding to cytoplasmic tail of membrane receptors) |
| 3. Lissencephaly type 1 homology (LisH)   | 367-393     | Involved in dimerization / oligomerization                                       |
| 4. C-terminal to LisH (CTLH)              | 403-460     | Protein stability / degradation?                                                 |
| 5. Nuclear localization signal (NLS)      | 635-649     | Targets to nucleus                                                               |
| 6. CT11 RanBPM (CRA)                      | 616-728     | Protein-protein interactions (binding to Fragile X Mental Retardation Protein)   |
